# Supplementary material
Source: MDPI journal article supplement (https://www.mdpi.com/1424-8247/15/8/921)
Supplement: s1 [file s1]

# Copper(I)-chloroquine complexes: Interaction with DNA and Ferriprotoporphyrin, Inhibition of $\beta$ -hematin Formation and Relation to Antimalarial Activity

Wilmer Villarreal <sup>1,2</sup>, William Castro <sup>2</sup>, Sorenlis González <sup>2</sup>, Marylin Madamet <sup>3,4,5,6</sup>, Rémy Amalvict <sup>3,4,5,6</sup>, Bruno Pradines <sup>3,4,5,6</sup>, Maribel Navarro <sup>2,7\*</sup>

<sup>1</sup> Grupo de Química Inorgânica Medicinal e Reações Aplicadas. Instituto de Química, Universidade Federal do Rio Grande do Sul (UFRGS), Porto Alegre 91501-970, Brazil.

<sup>2</sup> Centro de Química, Instituto Venezolano de Investigaciones Científicas (IVIC). Caracas 1020-A, Venezuela.

<sup>3</sup> Unité Parasitologie et Entomologie, Département Microbiologie et Maladies Infectieuses, Institut de Recherche Biomédicale des Armées, Marseille 13005, France.

<sup>4</sup> Aix Marseille Unive, IRD, SSA, AP-HM, VITROME, Marseille 13005, France.

<sup>5</sup> IHU Méditerranée Infection, Marseille 13005, France.

<sup>6</sup> Centre National de Référence du Paludisme, Marseille 13005, France.

<sup>7</sup> Laboratório de Química Bioinorgânica e Catálise. Departamento de Química, Instituto de Ciências Exatas, Universidade Federal de Juiz de Fora (UFJF), Juiz de Fora 36036-900, Brazil.

## Supporting Information

**Figure S1 – S5:** <sup>1</sup>H, <sup>13</sup>C{<sup>1</sup>H}, <sup>1</sup>H-<sup>1</sup>H COSY, <sup>1</sup>H-<sup>13</sup>C HMQC and <sup>1</sup>H-<sup>13</sup>C HMBC NMR spectrum of [Cu(CQ)(PPh<sub>3</sub>)<sub>2</sub>]<sup>+</sup>NO<sub>3</sub> (**1**) in CD<sub>2</sub>Cl<sub>2</sub> at 298 K.

**Figure S6:** <sup>31</sup>P{<sup>1</sup>H} NMR spectrum of [Cu(CQ)(PPh<sub>3</sub>)<sub>2</sub>]<sup>+</sup>NO<sub>3</sub> (**1**) in CD<sub>2</sub>Cl<sub>2</sub> at 298 K.

**Table S1:** Chemical shifts of the protons and carbons for the complex **1** and their variations when compared with the free chloroquine ligand.

**Figure S7:** Theoretical (a) and Experimental (b) isotopic distribution for [Cu(CQ)(PPh<sub>3</sub>)<sub>2</sub>]<sup>+</sup>.

**Figure S8:** EPR spectra for (a) [Cu(PPh<sub>3</sub>)<sub>2</sub>](NO<sub>3</sub>), (b) [Cu(CQ)(PPh<sub>3</sub>)<sub>2</sub>]<sup>+</sup>NO<sub>3</sub> and (c) Cu(II) complex for comparison.

**Figure S9:** <sup>1</sup>H NMR spectra of the complex **2** in 90% DMSO-*d*<sub>6</sub> and 10% PBS-*D*<sub>2</sub>O, obtained at 0 – 48 h after sample preparation. [Complex **2**] = 13.9 mM.

**Figure S10:** <sup>1</sup>H NMR spectra of the complex **1** in 90% DMSO-*d*<sub>6</sub> and 10% PBS-*D*<sub>2</sub>O, obtained at 0 – 48 h after sample preparation. [Complex **1**] = 9.2 mM.

**Figure S11:** <sup>31</sup>P{<sup>1</sup>H} NMR spectra of the complex **1** in 90% DMSO-*d*<sub>6</sub> and 10% PBS-*D*<sub>2</sub>O, obtained at 0 – 48 h after sample preparation. [Complex **1**] = 9.2 mM.

**Figure S12:** Absorption spectra of the complexes **1**(a) and **2**(b) in 10% DMSO and 90% PBS, obtained at 0 – 48 h after sample preparation. [Complex] = 10 μM.

M. Navarro / Wilmer Villarreal / MNWV-48. / CD<sub>2</sub>Cl<sub>2</sub>.  
Protones.

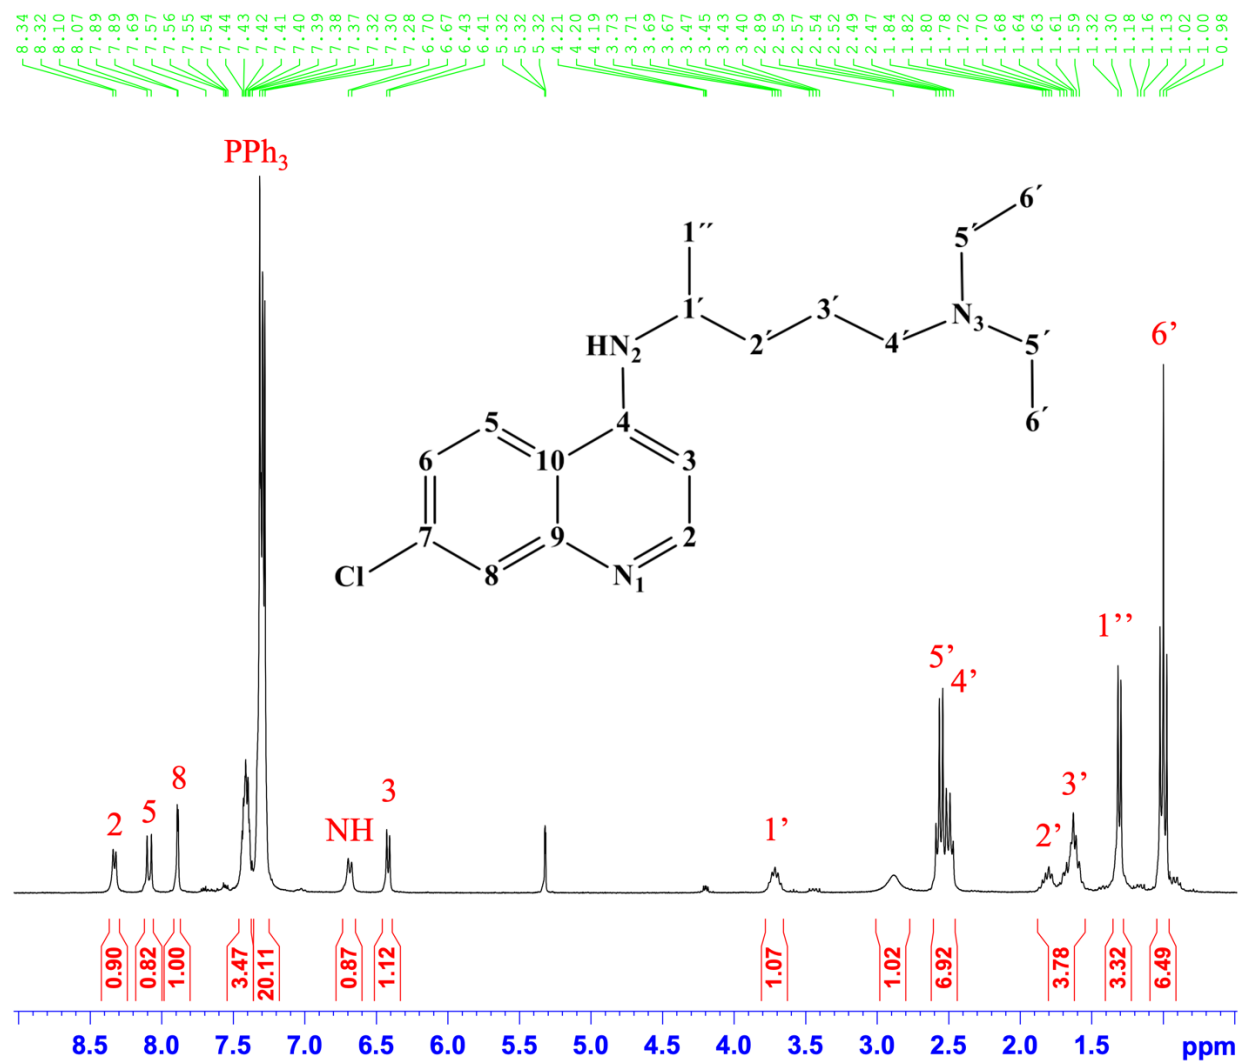

Figure S1 – The <sup>1</sup>H NMR spectrum of [Cu(CQ)(PPh<sub>3</sub>)<sub>2</sub>]<sup>+</sup>NO<sub>3</sub><sup>-</sup> (1) in CD<sub>2</sub>Cl<sub>2</sub> at 298 K

M. Navarro / W.Villarreal / MNWV-48 / CD<sub>2</sub>Cl<sub>2</sub> / Carbone.

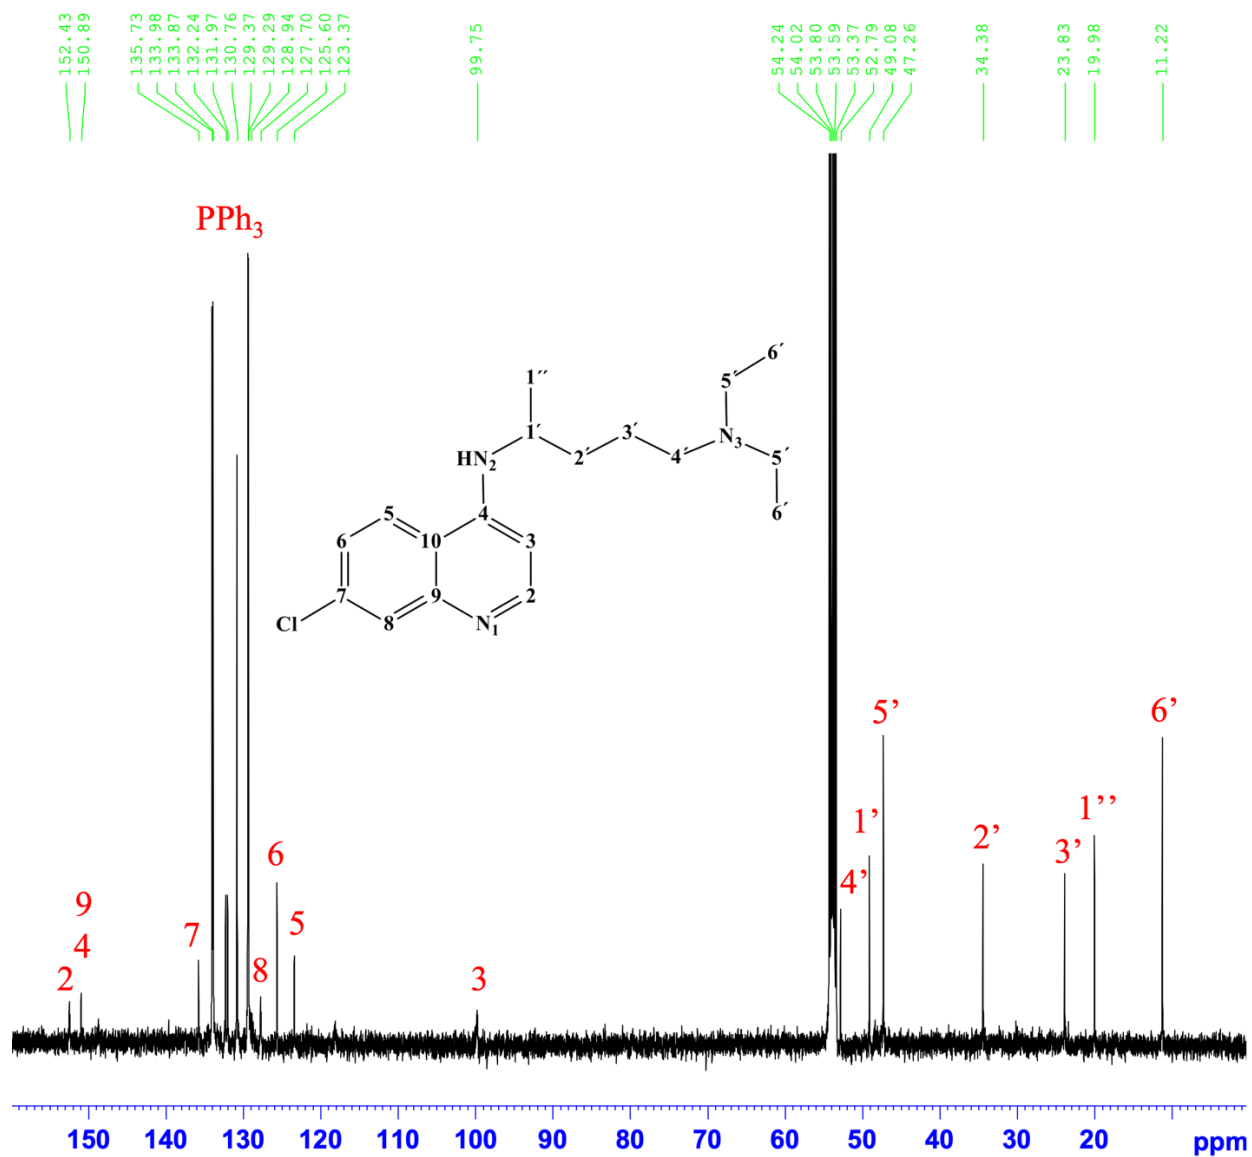

Figure S2 – The <sup>13</sup>C{<sup>1</sup>H} NMR spectrum of [Cu(CQ)(PPh<sub>3</sub>)<sub>2</sub>]<sup>+</sup>NO<sub>3</sub><sup>-</sup> (1) in CD<sub>2</sub>Cl<sub>2</sub> at 298 K

M. Navarro / Wilmer Villarreal / MNWV-48. / CD<sub>2</sub>Cl<sub>2</sub>.  
Cosy.

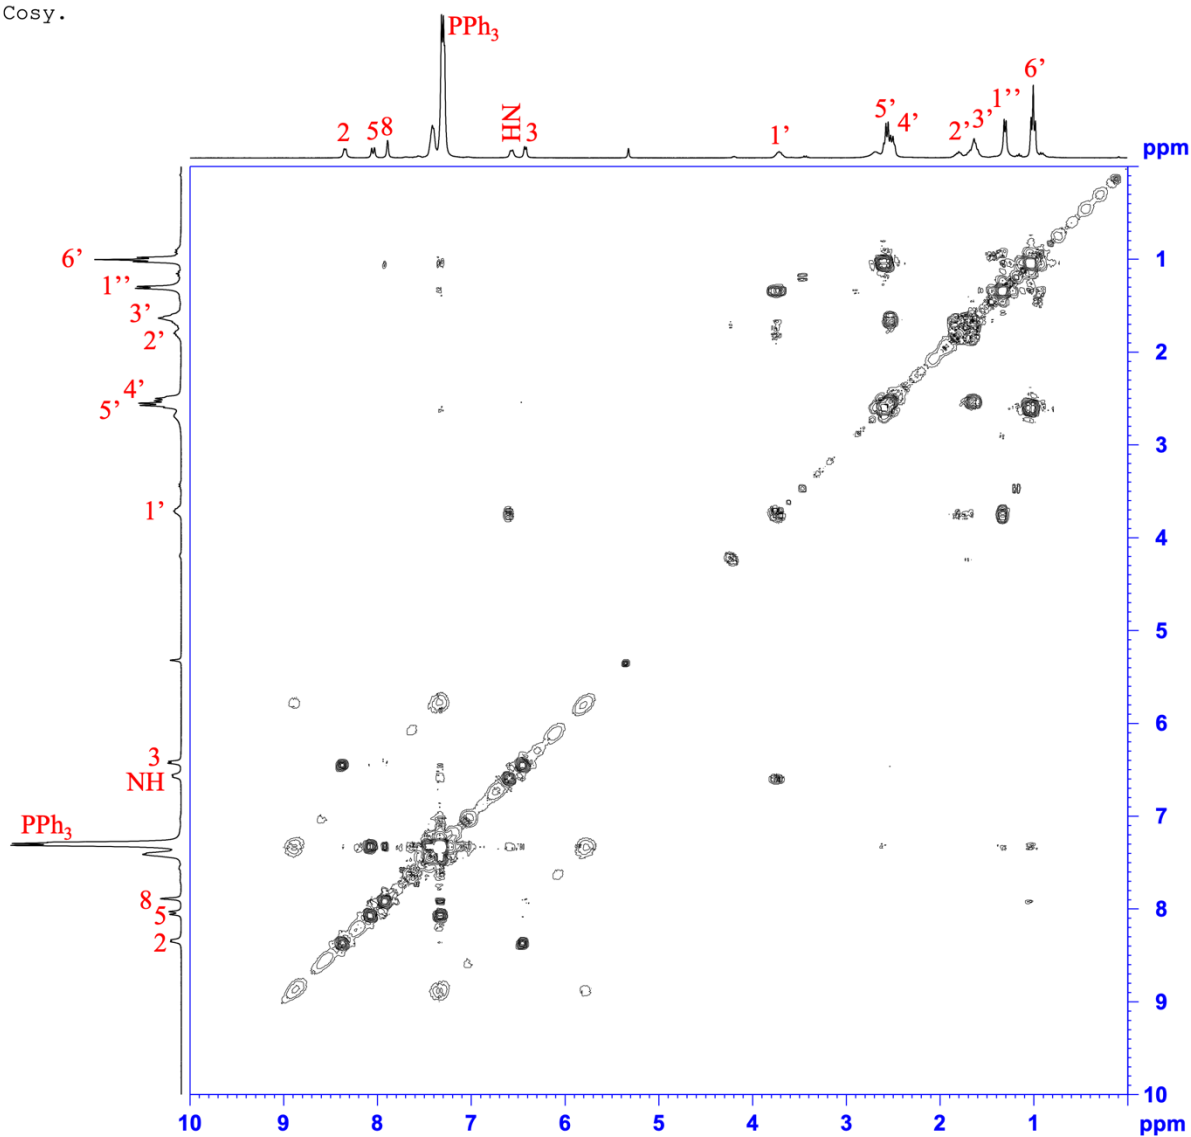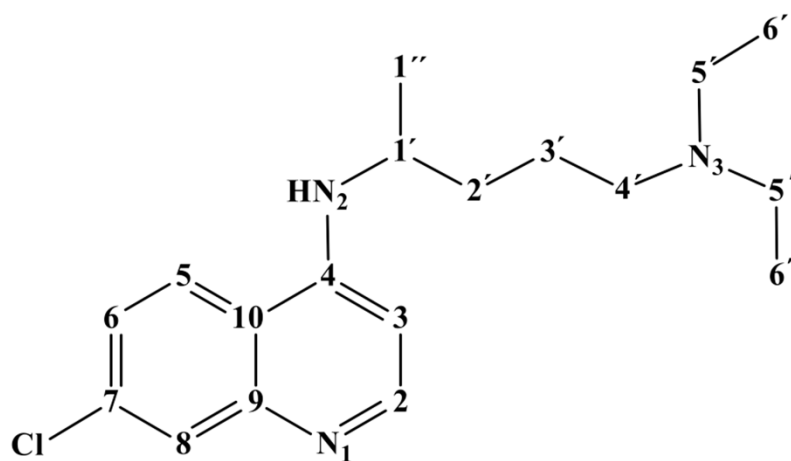

Figure S3 – The 2D homonuclear <sup>1</sup>H-<sup>1</sup>H COSY NMR spectrum of [Cu(CQ)(PPh<sub>3</sub>)<sub>2</sub>]<sup>+</sup>NO<sub>3</sub><sup>-</sup> (**1**) in CD<sub>2</sub>Cl<sub>2</sub> at 298 K

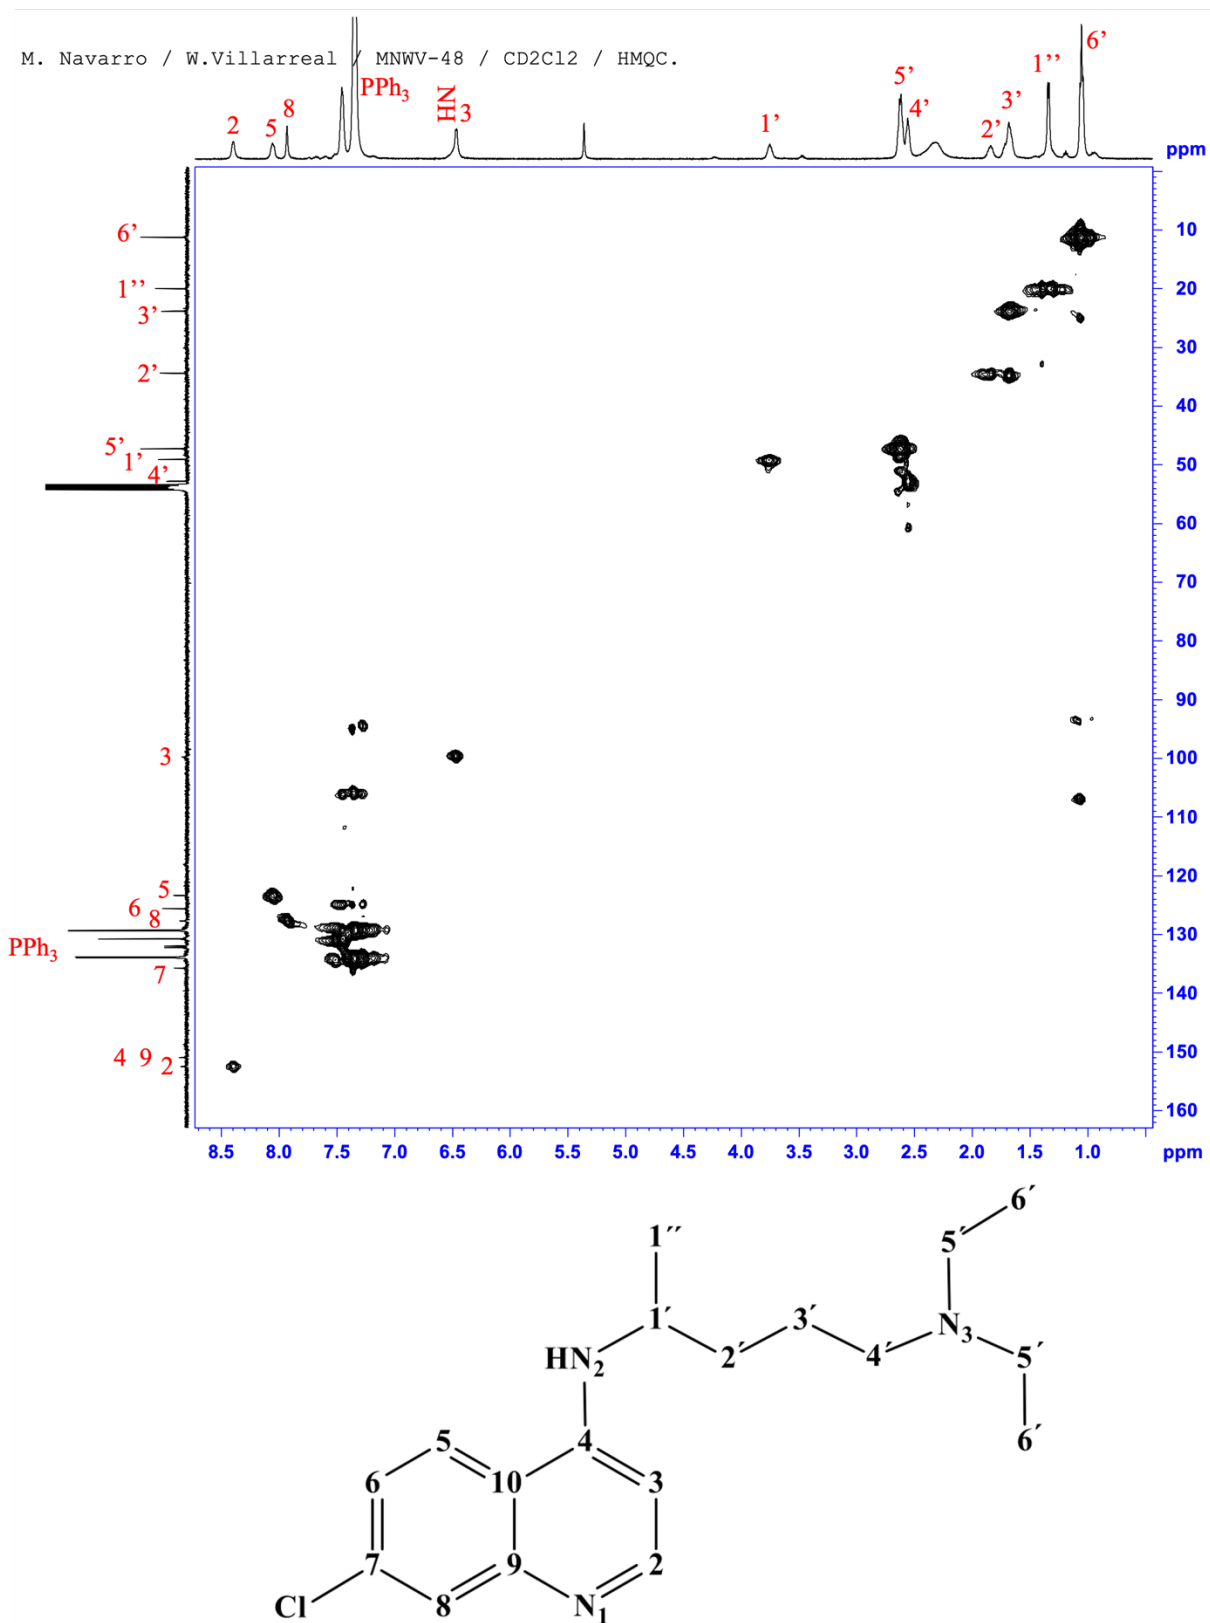

Figure S4 – The 2D heteronuclear <sup>1</sup>H-<sup>13</sup>C HMQC NMR spectrum of [Cu(CQ)(PPh<sub>3</sub>)<sub>2</sub>]NO<sub>3</sub> (**1**) in CD<sub>2</sub>Cl<sub>2</sub> at 298 K

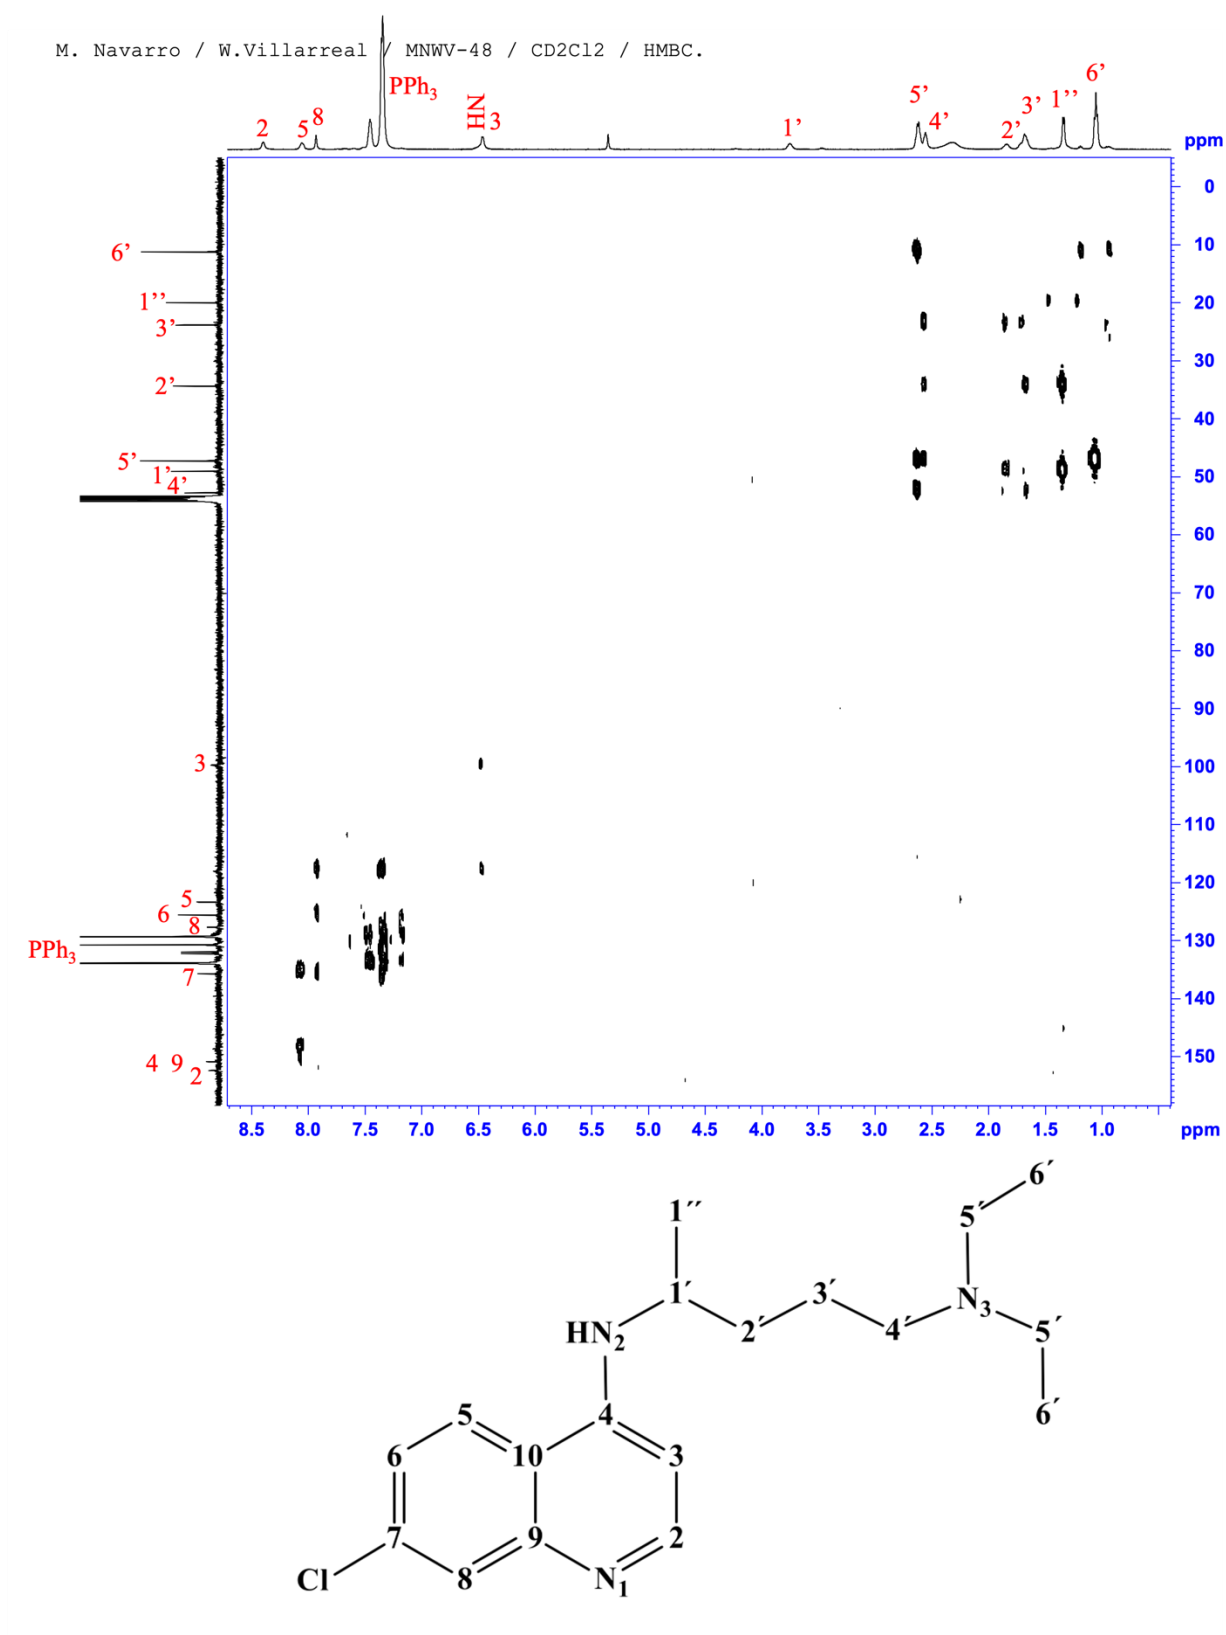

Figure S5 – The 2D heteronuclear <sup>1</sup>H-<sup>13</sup>C HMBC NMR spectrum of [Cu(CQ)(PPh<sub>3</sub>)<sub>2</sub>]NO<sub>3</sub> (**1**) in CD<sub>2</sub>Cl<sub>2</sub> at 298 K

M. Navarro / Wilmer Villarreal / MNWV-48. / CD<sub>2</sub>Cl<sub>2</sub>.  
Fosforo.

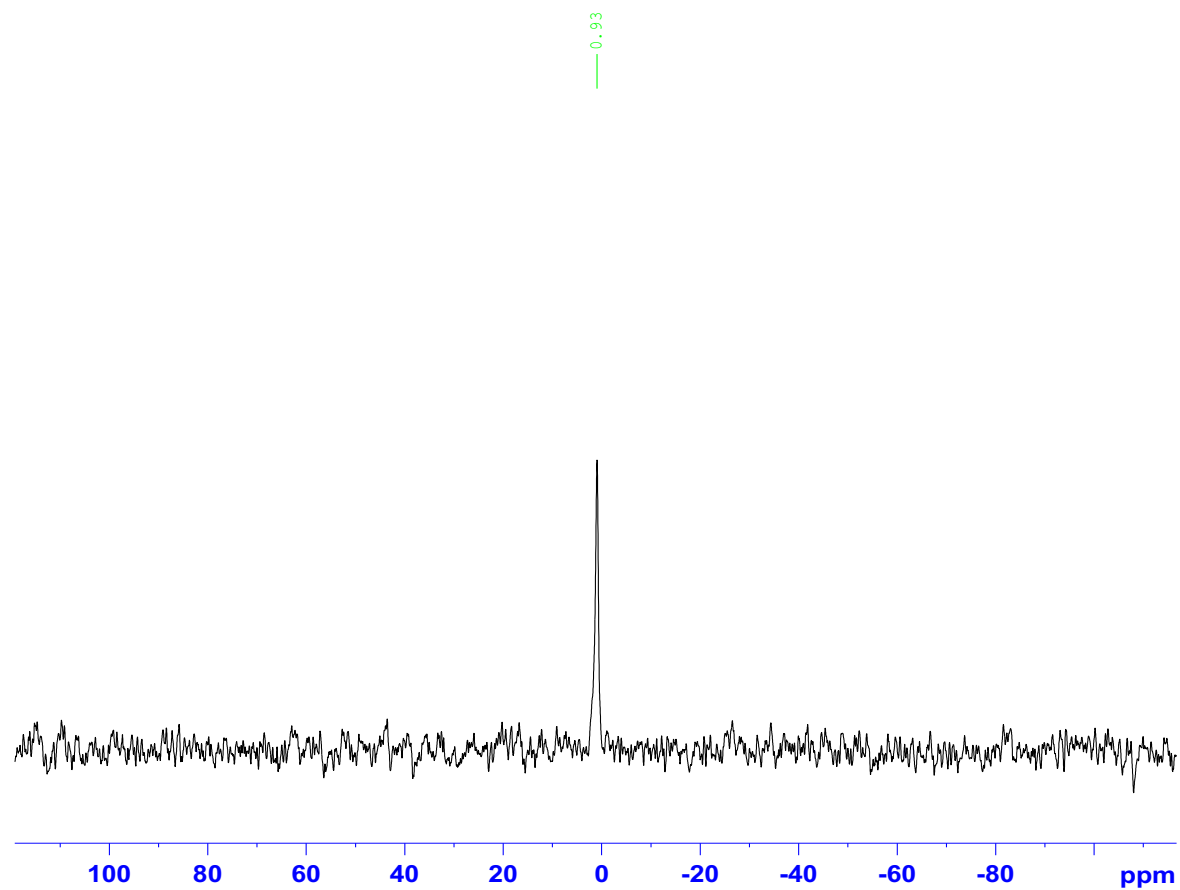

Figure S6 -  $^{31}\text{P}\{^1\text{H}\}$  NMR spectrum of  $[\text{Cu}(\text{CQ})(\text{PPh}_3)_2]\text{NO}_3$  (**1**) in  $\text{CD}_2\text{Cl}_2$  at 298 K

Table S1 - Chemical shifts of the protons and carbons for the complex **1** and their variations when compared with the free chloroquine ligand

| Chemical shifts in $^1\text{H}$ NMR<br>( $\text{CH}_2\text{Cl}_2-d_2$ ) |                |                | Chemical shifts in $^{13}\text{C}\{^1\text{H}\}$ NMR<br>( $\text{CH}_2\text{Cl}_2-d_2$ ) |                |                |
|-------------------------------------------------------------------------|----------------|----------------|------------------------------------------------------------------------------------------|----------------|----------------|
| Position                                                                | $\delta$ (ppm) | $\Delta$ (ppm) | Position                                                                                 | $\delta$ (ppm) | $\Delta$ (ppm) |
| 6'                                                                      | 1.00           | 0.02           | 6'                                                                                       | 11.22          | 0.40           |
| 1''                                                                     | 1.31           | 0.01           | 1''                                                                                      | 19.98          | 0.22           |
| 2' and 3'                                                               | 1.71           | 0.06           | 3'                                                                                       | 23.83          | 0.36           |
| 4' and 5'                                                               | 2.47           | 0.07           | 2'                                                                                       | 34.38          | 0.39           |
| 1'                                                                      | 3.70           | 0.01           | 5'                                                                                       | 47.26          | 0.08           |
| NH                                                                      | 6.68           | 1.27           | 1'                                                                                       | 49.08          | 0.33           |
| 3                                                                       | 6.42           | 0.04           | 4'                                                                                       | 52.79          | 0.07           |
| PPh <sub>3</sub>                                                        | 7.38           | -----          | 3                                                                                        | 99.75          | 0.08           |
| 5                                                                       | 8.09           | 0.72           | 10                                                                                       | 118.20         | 0.32           |
| 8                                                                       | 7.90           | 0.01           | 5                                                                                        | 123.37         | 1.23           |
| 2                                                                       | 8.33           | 0.13           | 6                                                                                        | 125.60         | 0.6            |
|                                                                         |                |                | 8                                                                                        | 127.70         | 1.11           |
|                                                                         |                |                | b                                                                                        | 129.33         | ----           |
|                                                                         |                |                | a                                                                                        | 130.76         | ----           |
|                                                                         |                |                | d                                                                                        | 132.06         | ----           |
|                                                                         |                |                | c                                                                                        | 133.55         | ----           |
|                                                                         |                |                | 7                                                                                        | 135.73         | 0.93           |
|                                                                         |                |                | 9                                                                                        | 150.89         | 1.24           |
|                                                                         |                |                | 4                                                                                        | 150.92         | 1.11           |
|                                                                         |                |                | 2                                                                                        | 152.43         | 0.15           |



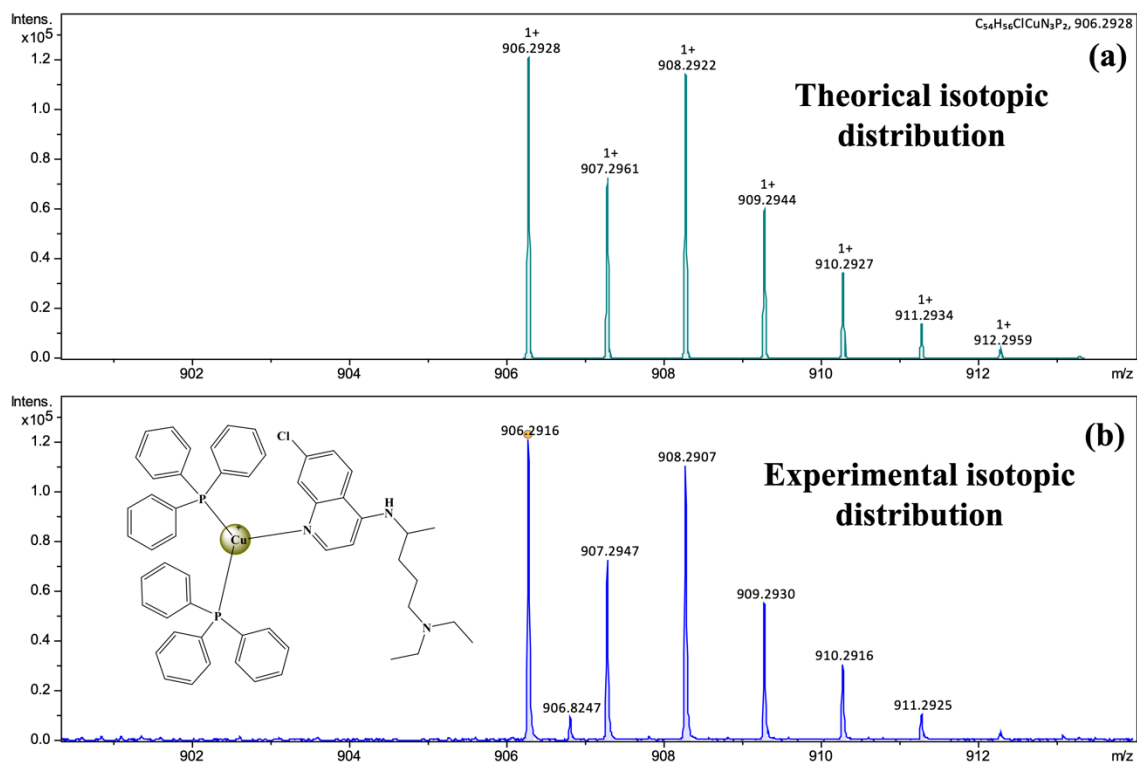

Figure S7 - Theoretical (a) and Experimental (b) isotopic distribution for  $[\text{Cu}(\text{CQ})(\text{PPh}_3)_2]^+$ .

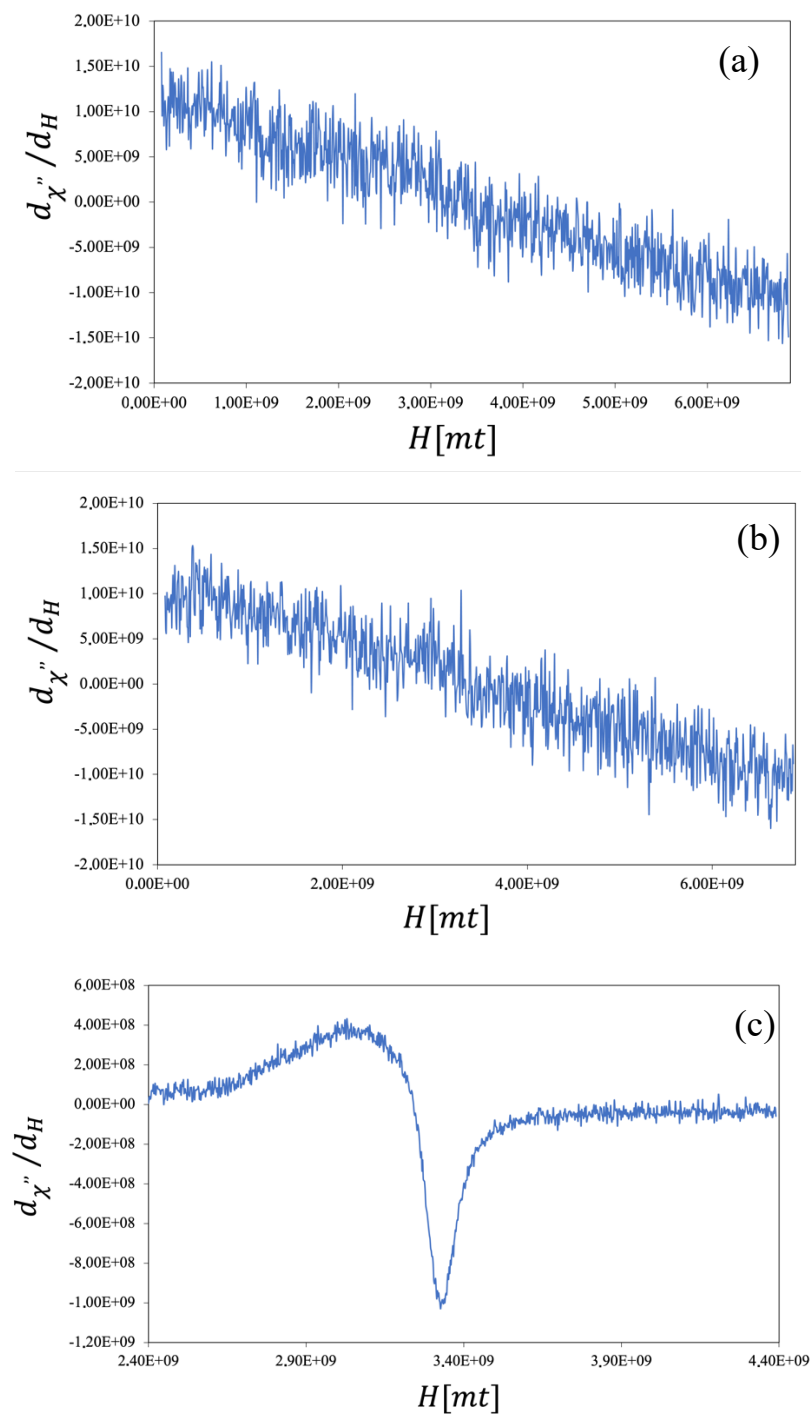

Figure S8 – EPR spectra for (a)  $[\text{Cu}(\text{PPh}_3)_2(\text{NO}_3)]$ , (b)  $[\text{Cu}(\text{CQ})(\text{PPh}_3)_2]\text{NO}_3$  and (c) Cu(II) complex for comparison.

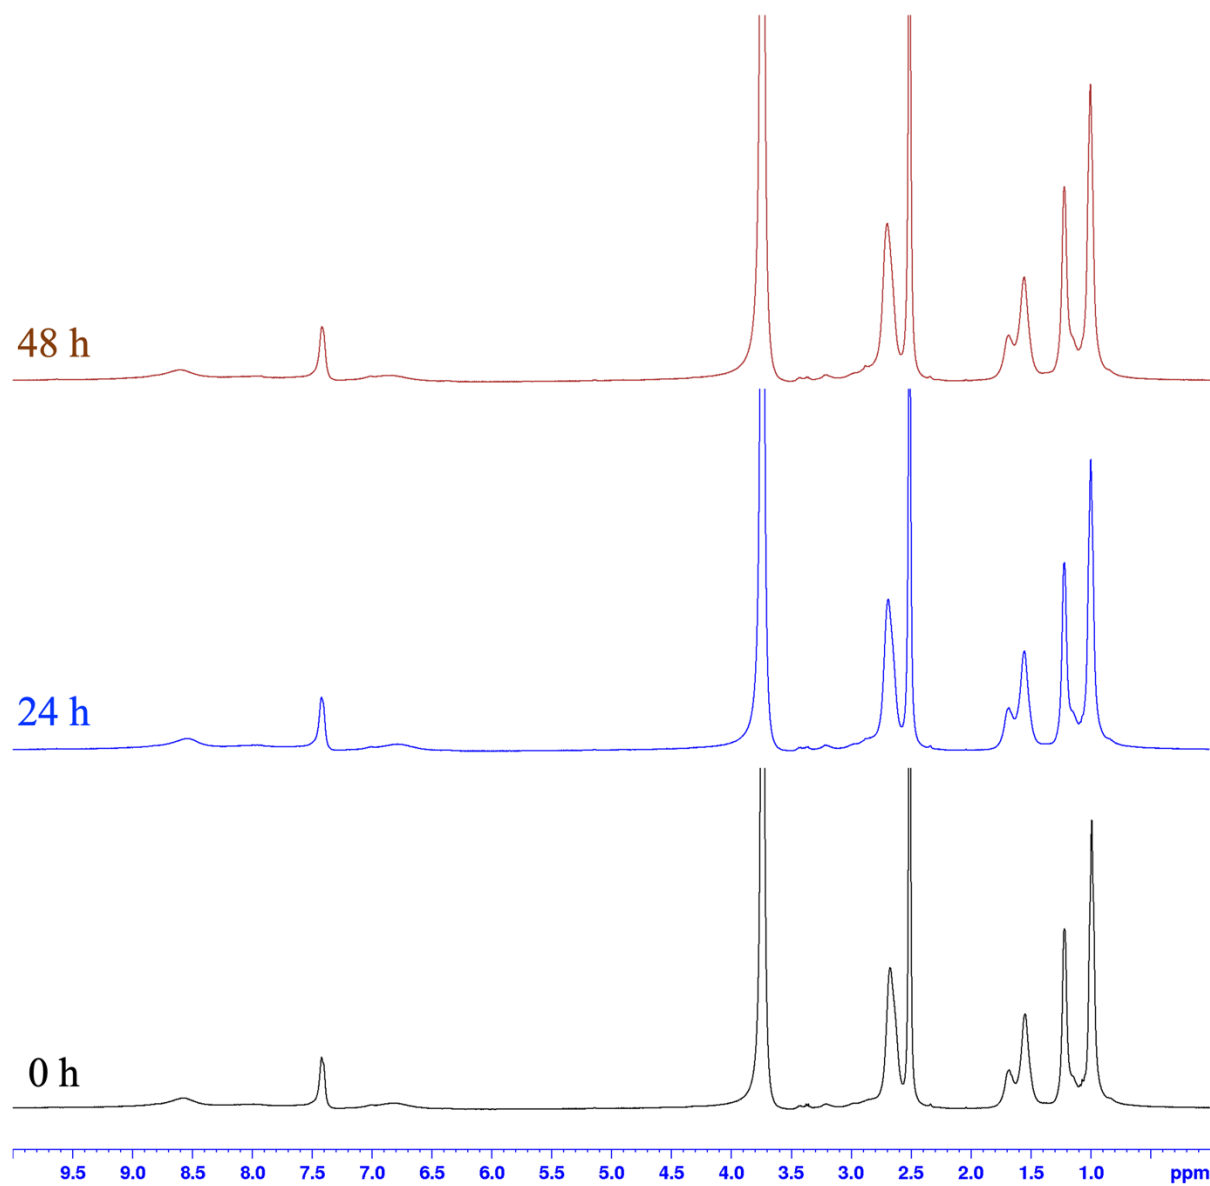

Figure S9 –  $^1\text{H}$  NMR spectra of the complex **2** in 90%  $\text{DMSO}-d_6$  and 10%  $\text{PBS}-D_2O$ , obtained at 0 – 48 h after sample preparation.  $[\text{Complex } \mathbf{2}] = 13.9 \text{ mM}$ .

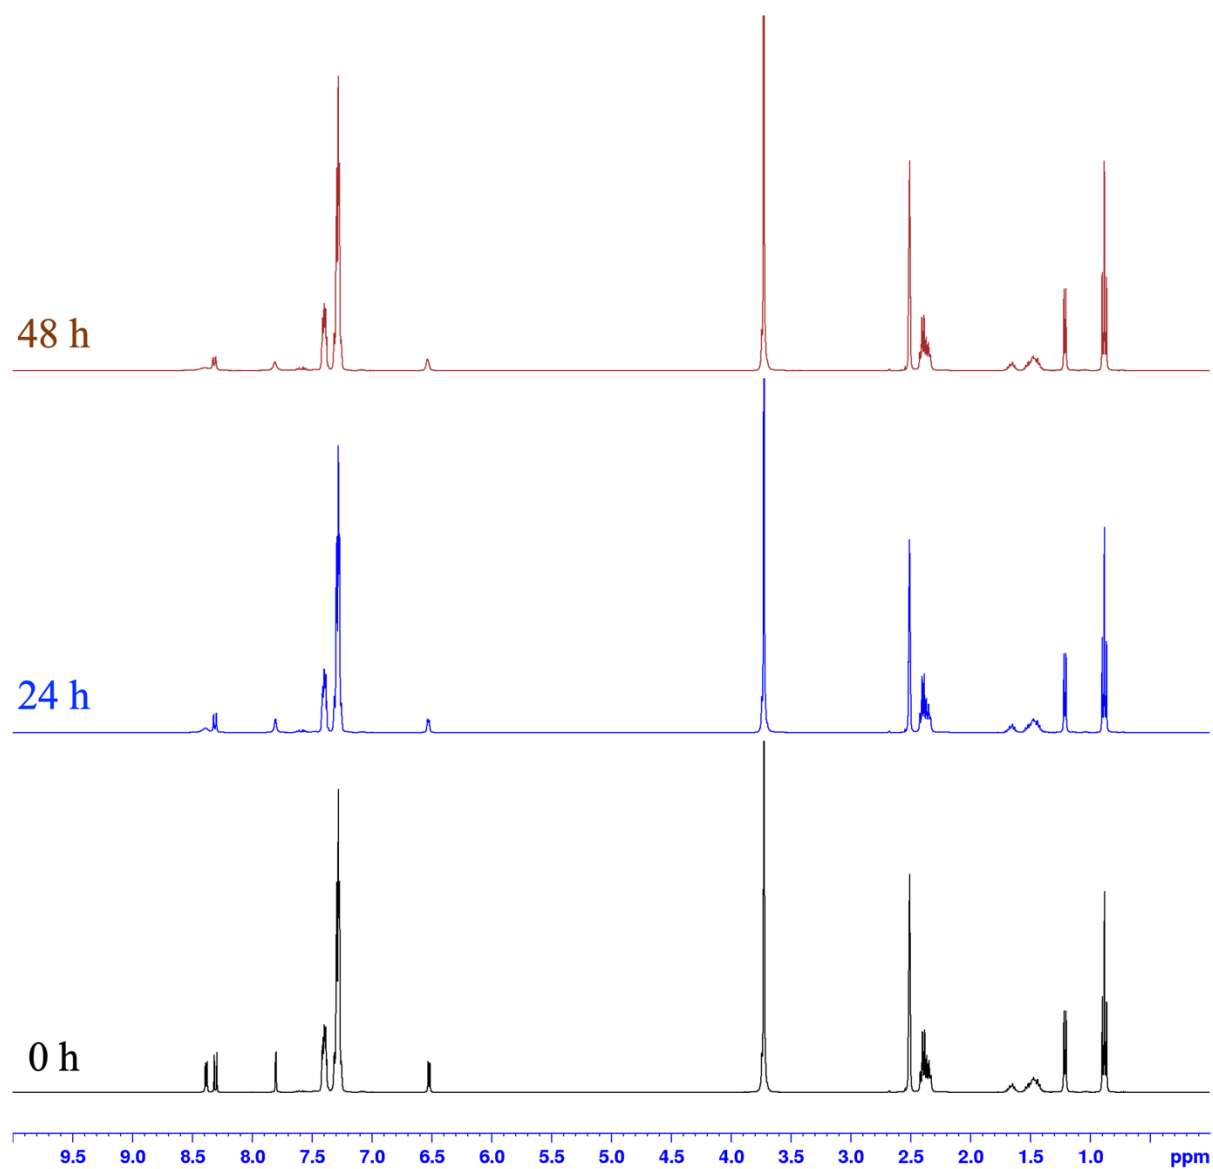

Figure S10 –  $^1\text{H}$  NMR spectra of the complex **1** in 90%  $\text{DMSO}-d_6$  and 10%  $\text{PBS}-D_2O$ , obtained at 0 – 48 h after sample preparation.  $[\text{Complex } \mathbf{1}] = 9.2 \text{ mM}$ .

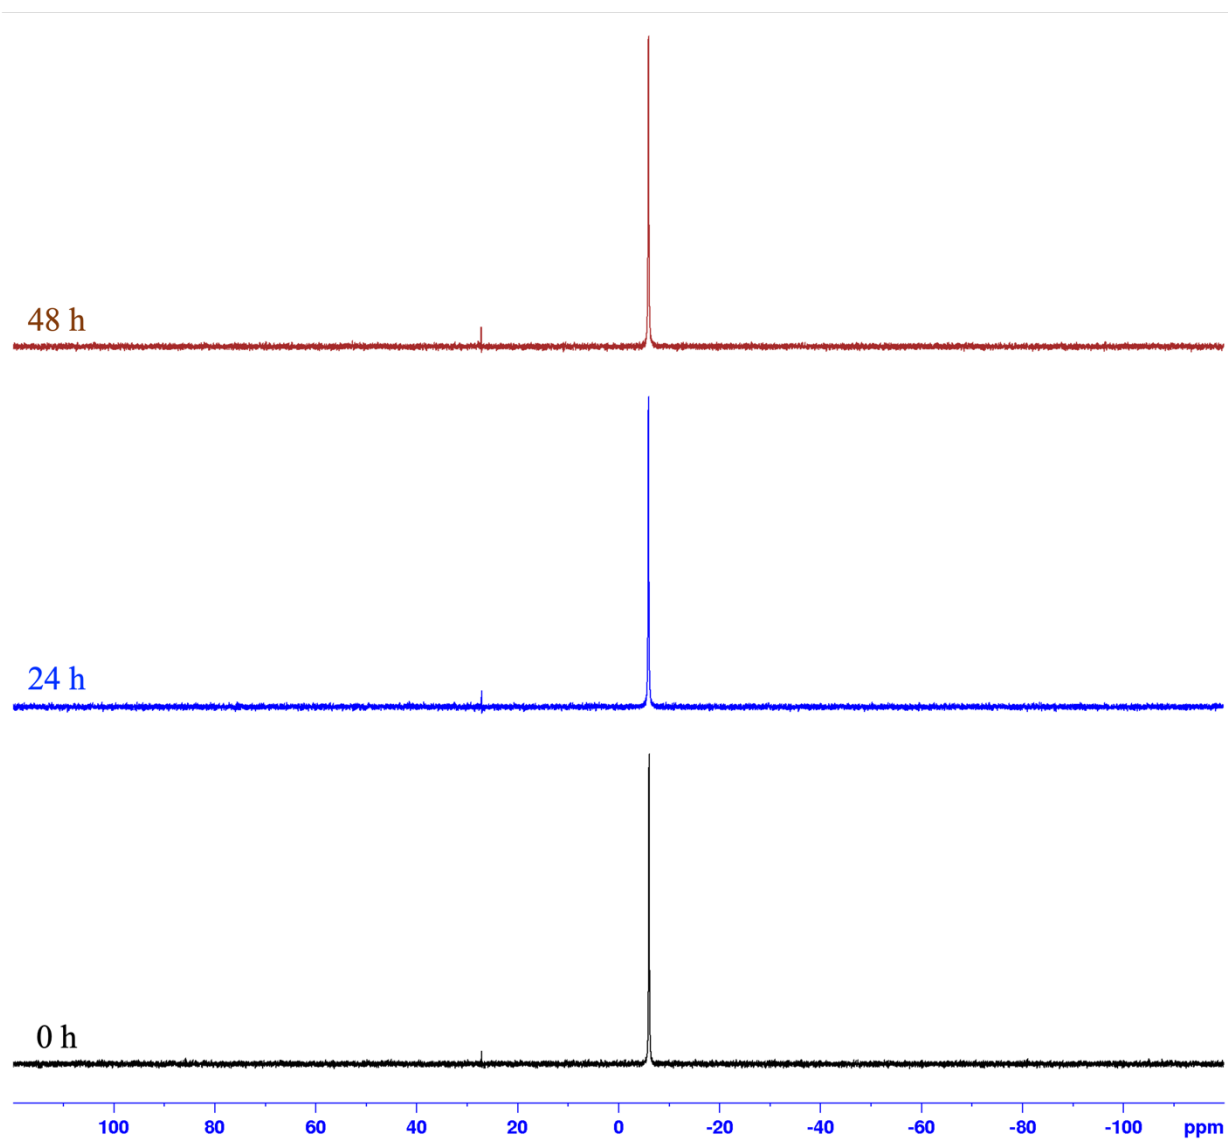

Figure S11 –  $^{31}\text{P}\{^1\text{H}\}$  NMR spectra of the complex **1** in 90%  $\text{DMSO}-d_6$  and 10%  $\text{PBS}-D_2\text{O}$ , obtained at 0 – 48 h after sample preparation .  $[\text{Complex } \mathbf{1}] = 9.2 \text{ mM}$ .

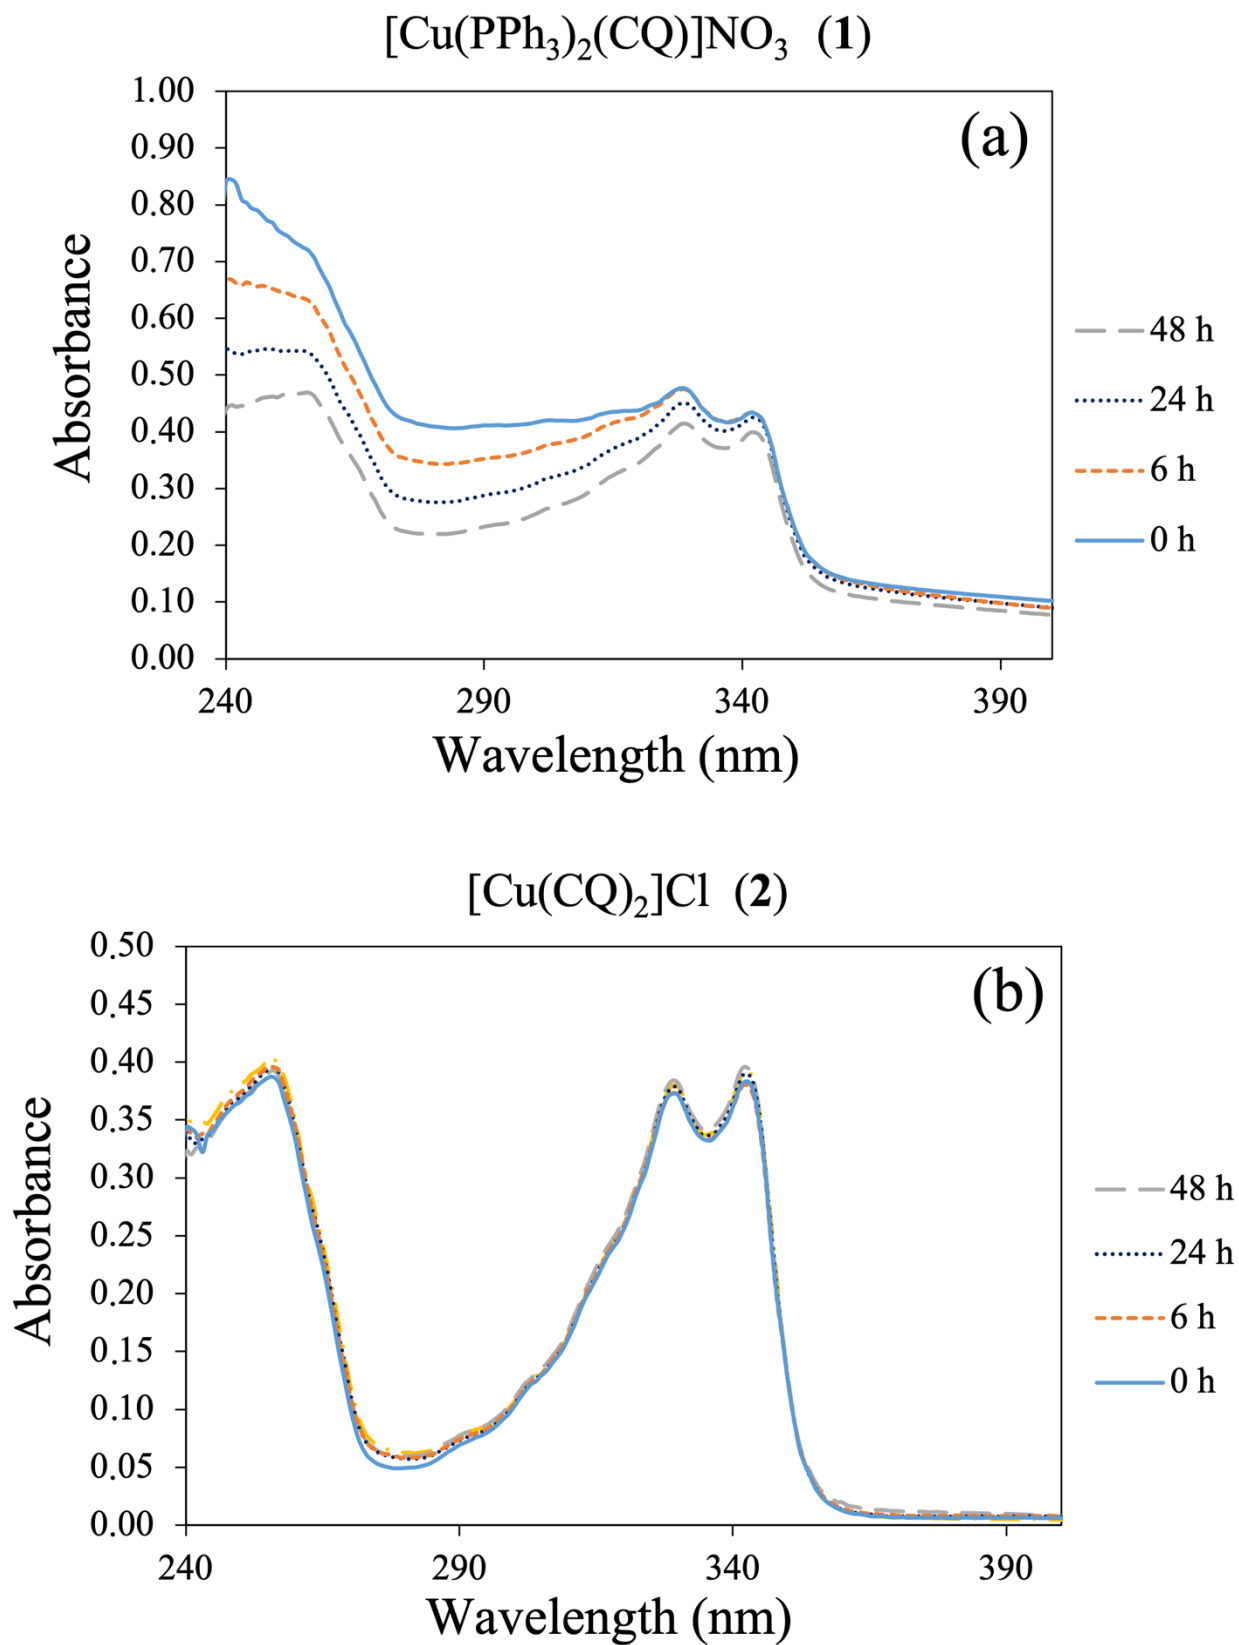

Figure S12 – Absorption spectra of the complexes **1**(a) and **2**(b) in 10% DMSO and 90% PBS, obtained at 0 – 48 h after sample preparation .  $[\text{Complex}] = 1 \text{ } \mu\text{M}$ .
